# Supplementary material for: Ambient synthesis of a multifunctional 1D/2D hierarchical Ag–Ag2S nanowire/nanosheet heterostructure with diverse applications
Source: Royal Society of Chemistry journal article supplement (doi:10.1039/c5ce02134k), 2015-12-22
Supplement: c5ce02134k1.pdf [file c5ce02134k1.pdf]

## Supporting Information (SI)

### **Ambient Synthesis of a Multifunctional 1D/2D Hierarchical Ag-Ag<sub>2</sub>S Nanowire/Nanosheet Heterostructure with Diverse Applications**

Jinyan Xiong,<sup>a</sup> Chao Han,<sup>a</sup> Weijie Li,<sup>a</sup> Qiao Sun,<sup>b</sup> Jun Chen,<sup>c</sup> Shulei Chou,<sup>a</sup> Zhen Li,<sup>a,b,\*</sup> and Shixue Dou<sup>a</sup>

<sup>a</sup> Institute for Superconducting & Electronic Materials, The University of Wollongong, NSW 2500, Australia

<sup>b</sup> School of Radiation Medicine and Radiation Protection, Collaborative Innovation Center of Radiation Medicine of Jiangsu Higher Education Institutions, Soochow University, 199 Ren Ai Road, Suzhou Industrial Park, Suzhou 215123, China.

<sup>c</sup> Intelligent Polymer Research Institute, The University of Wollongong, NSW 2500, Australia

\*Corresponding author: zhenl@uow.edu.au and zhenli@suda.edu.cn; Tel:

+86-512-65882931; Fax: +86-512-65884830.

Fig. S1

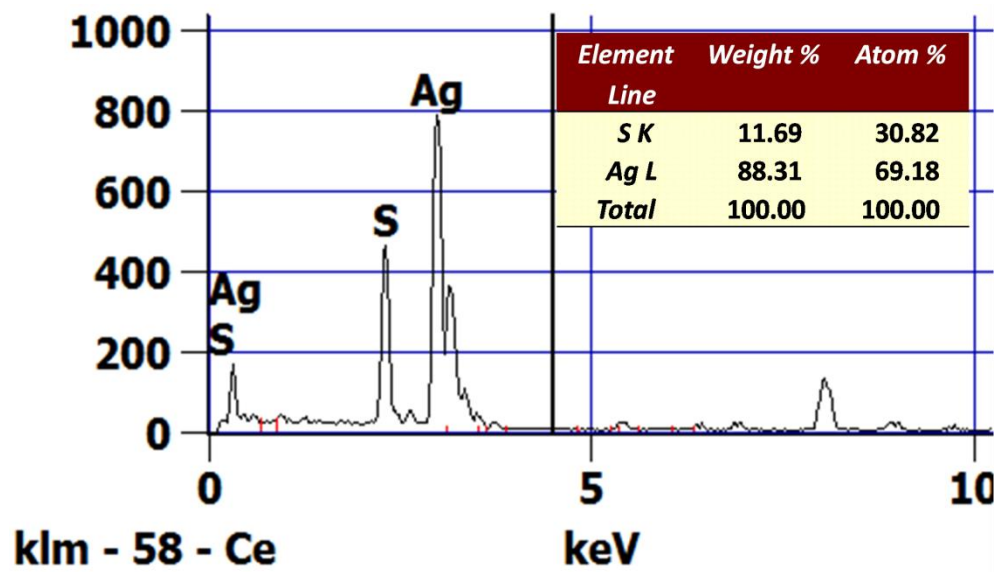

Fig. S1 EDX spectrum of as-synthesized 1D/2D Ag-Ag<sub>2</sub>S heterostructures

**Fig. S2**

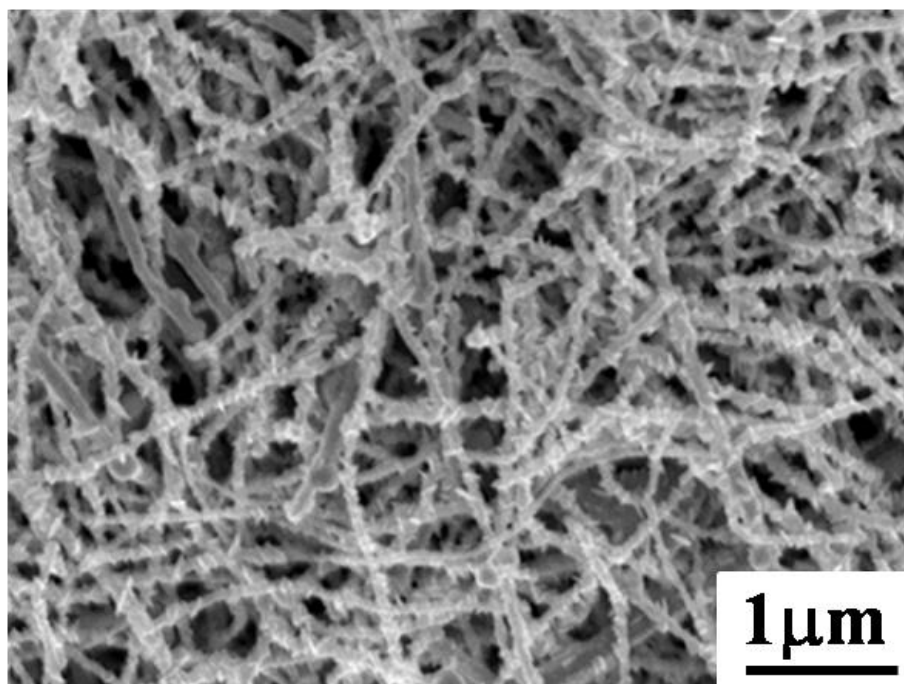

**Fig. S2** SEM image of the as-prepared Ag-Ag<sub>2</sub>S heterostructures.

**Fig. S3**

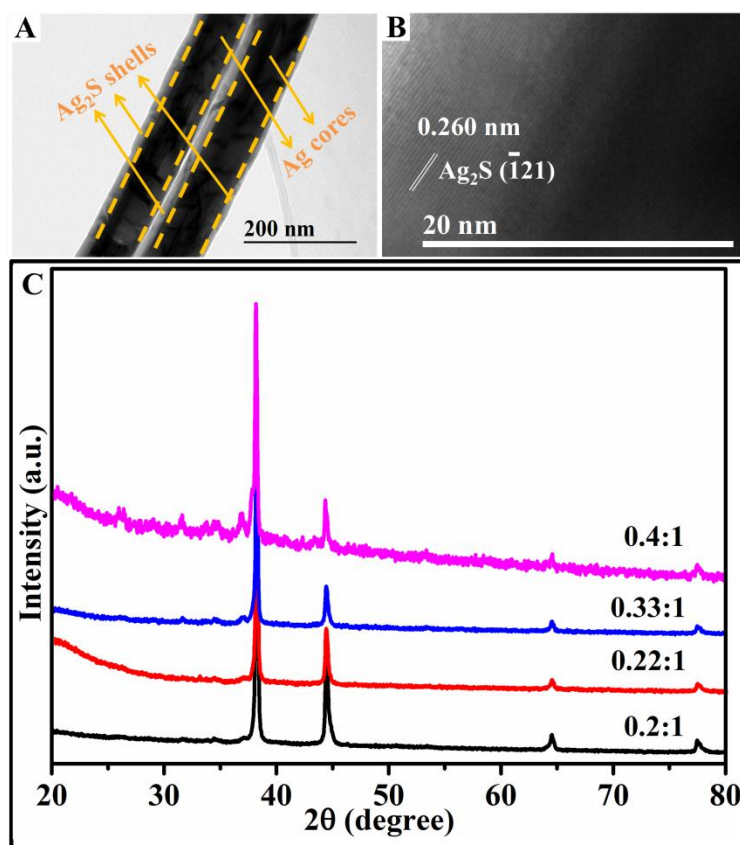

**Fig. S3** (A) TEM image and (B) HRTEM image of the product prepared with an S to Ag ratio of 0.2:1; (C) XRD patterns of the products prepared with different molar ratios of sulfur powder to Ag nanowires.

**Fig. S4**

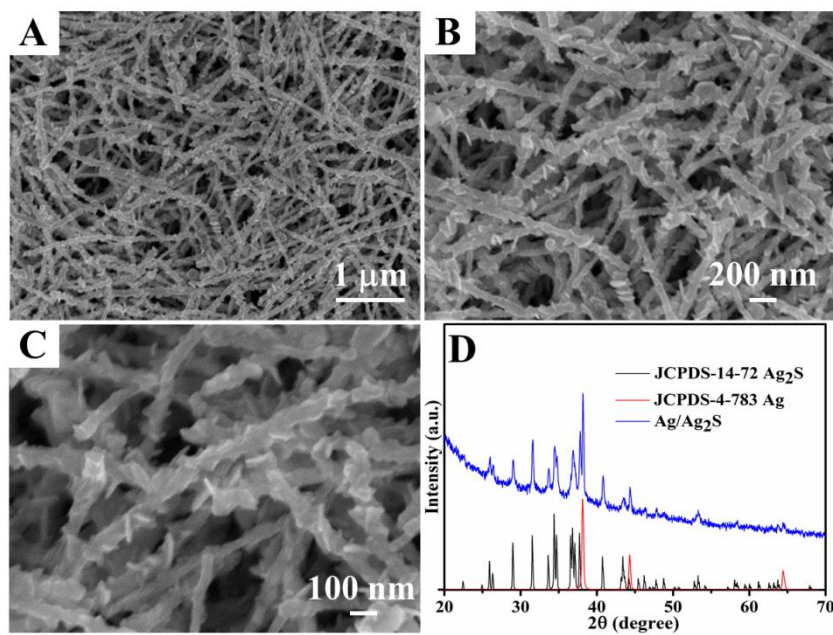

**Fig. S4** (A-C) SEM images and (D) XRD pattern of the Ag-Ag<sub>2</sub>S heterostructures obtained after 6 days.

**Fig. S5**

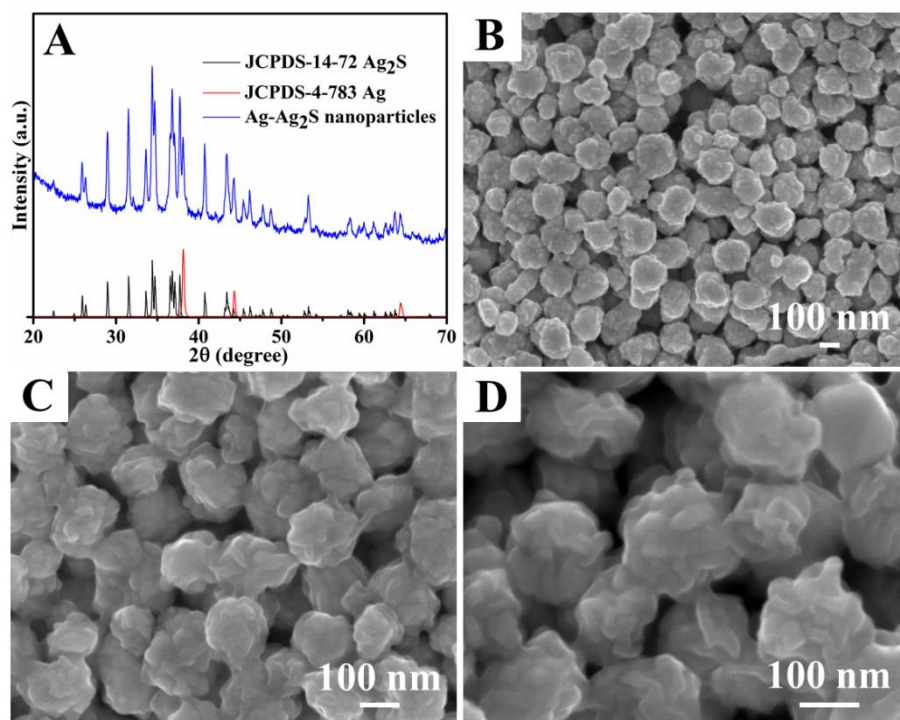

**Fig. S5** (A) XRD pattern and (B-D) SEM images of the Ag- $\text{Ag}_2\text{S}$  nanoparticles.

**Fig. S6**

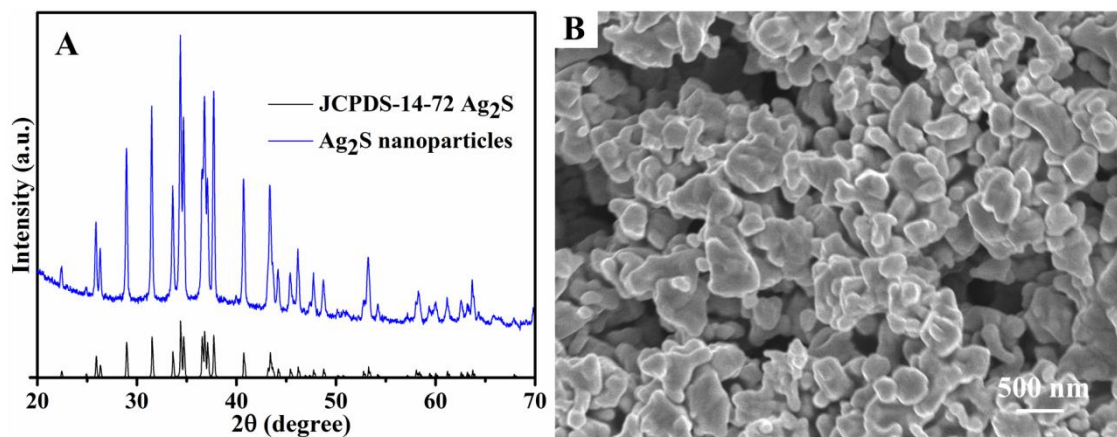

**Fig. S6** (A) XRD pattern and (B) SEM image of the pure Ag<sub>2</sub>S nanoparticles.

**Fig. S7**

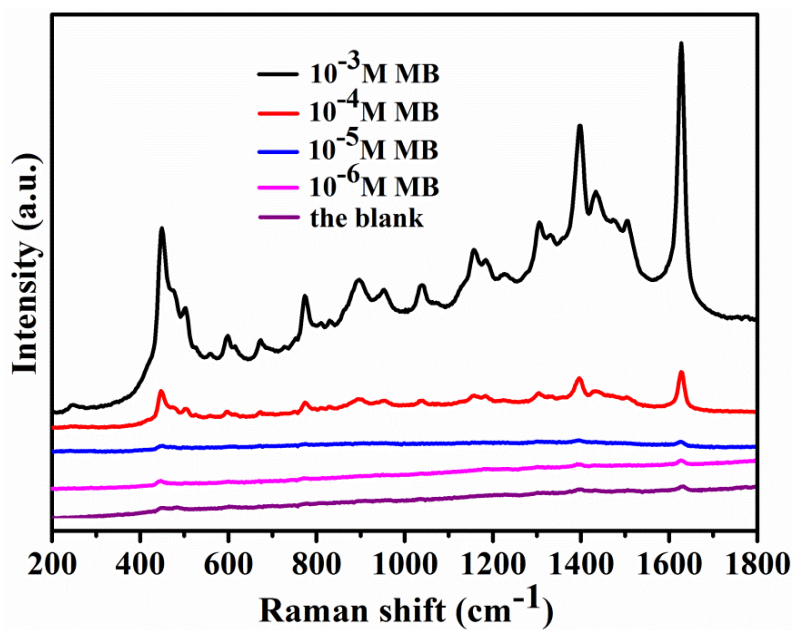

**Fig. S7** SERS spectra of MB solutions with different concentrations adsorbed on 1D/2D hierarchical Ag-Ag<sub>2</sub>S hybrid heterostructures.
